# Supplementary material for: Lymphatic Mapping in Colon Cancer Depending on Injection Time and Tracing Agent: A Systematic Review and Meta-Analysis of Prospective Designed Studies
Source: MDPI journal article supplement (doi:10.3390/cancers15123196), 2023-06-15
Supplement: s1 [file s1]

## Supplementary data

# Lymphatic mapping in colon cancer depending on injection time and tracing agent: a systematic review and meta-analysis of prospective designed studies

### Data S1: Search strategy

Search strategy: Searched databases include Medline, Web of Science, including “forward cited search” [1-3] and Embase (through OVID), register searched include Cochrane and PROSPERO. Originally, a Pubmed search string was validated by preliminarily finding already known studies and translated via SR-accelerators polyglot search [4] to match other databases. All searches were conducted on July 20<sup>th</sup>, 2021, the original search string can be found in the supplementary data. The process of this search is displayed in table 1. A second search using the same search strategies was conducted on February 13<sup>th</sup>, 2023, with the objective of finding newly published studies. Five newly published studies [5-9] were included. Reviews [10-16] concerning similar research topics were manually searched for possible missed publications. One study [17] was found through this process.

The full Pubmed search string with the restriction to “human” was:

```
((("colon carcinoma"[Text Word] OR "colon cancer"[Text Word] OR "colon neoplasms"[Text Word] OR "Ileal Neoplasms"[Text Word] OR "neuroendocrine tumor"[Text Word] OR "neuroendocrine tumour"[Text Word] OR "Colorectal Neoplasms"[MeSH Terms] OR "Neuroendocrine Tumors"[MeSH Terms:noexp] OR "Ileal Neoplasms"[MeSH Terms]) AND ("lymphatic visualiza*"[Text Word] OR "lymphatic mapp*"[Text Word] OR "Lymphatic System"[MeSH Terms] OR "Lymph Nodes"[MeSH Terms] OR "Sentinel Lymph Node Biopsy"[MeSH Terms] OR "Lymph Nodes"[MeSH Terms] OR "Sentinel Lymph Node"[MeSH Terms] OR "lymphatic disease"[Text Word] OR "Lymphatic Metastasis"[Text Word] OR "lymph node metastasis"[Text Word] OR "Lymphatic Metastasis"[MeSH Terms] OR "Sentinel Lymph Node"[MeSH Terms]) AND ("fluorescence marking"[Text Word] OR "ICG marking"[Text Word] OR "ICG"[Text Word] OR "near-infrared fluorescence"[Text Word] OR "imaging-guided"[Text Word] OR "Fluorescence"[MeSH Terms] OR "Optical Imaging"[MeSH Terms] OR "Indocyanine Green"[MeSH Terms])) OR ((("colon carcinoma"[Text Word] OR "colon cancer"[Text Word] OR "colon neoplasms"[Text Word] OR "Ileal Neoplasms"[Text Word] OR "neuroendocrine tumor"[Text Word] OR "neuroendocrine tumour"[Text Word] OR "Colorectal Neoplasms"[MeSH Terms] OR "Neuroendocrine Tumors"[MeSH Terms:noexp] OR "Ileal Neoplasms"[MeSH Terms]) AND ("lymphatic visualiza*"[Text Word] OR "lymphatic mapp*"[Text Word] OR "Lymphatic System"[MeSH Terms] OR "Lymph Nodes"[MeSH Terms] OR "Sentinel Lymph Node Biopsy"[MeSH Terms] OR "Lymph Nodes"[MeSH Terms] OR "Sentinel Lymph Node"[MeSH Terms] OR "lymphatic disease"[Text Word] OR "Lymphatic Metastasis"[Text Word] OR "lymph node metastasis"[Text Word] OR "Lymphatic Metastasis"[MeSH Terms] OR "Sentinel Lymph Node"[MeSH Terms]) AND (((("ink marking"[Text Word] OR "ink tattooing"[Text Word] OR "tattooing"[Text Word] OR "dye"[Text Word] OR "isosulfan blue"[Text Word] OR "methylene
```

blue"[Text Word] OR "blue dye"[Text Word]) AND "patent blue"[Text Word]) OR "blue"[Text Word] OR "Optical Imaging"[MeSH Terms] OR "Ink"[MeSH Terms] OR "iso-sulfan blue"[Supplementary Concept])) OR (("colon carcinoma"[Text Word] OR "colon cancer"[Text Word] OR "colon neoplasms"[Text Word] OR "Ileal Neoplasms"[Text Word] OR "neuroendocrine tumor"[Text Word] OR "neuroendocrine tumour"[Text Word] OR "Colorectal Neoplasms"[MeSH Terms] OR "Neuroendocrine Tumors"[MeSH Terms:noexp] OR "Ileal Neoplasms"[MeSH Terms]) AND ("lymphatic visualiza\*"[Text Word] OR "lymphatic mapp\*"[Text Word] OR "Lymphatic System"[MeSH Terms] OR "Lymph Nodes"[MeSH Terms] OR "Sentinel Lymph Node Biopsy"[MeSH Terms] OR "Lymph Nodes"[MeSH Terms] OR "Sentinel Lymph Node"[MeSH Terms] OR "lymphatic disease"[Text Word] OR "Lymphatic Metastasis"[Text Word] OR "lymph node metastasis"[Text Word] OR "Lymphatic Metastasis"[MeSH Terms] OR "Sentinel Lymph Node"[MeSH Terms]) AND ("radiocolloid"[Text Word] OR "technetium-99m"[Text Word] OR "Tc-99m"[Text Word] OR "99m"[All Fields] OR "radioisotope"[Text Word] OR "radiotracer"[Text Word] OR "lymphatic tracer"[Text Word] OR "tracer"[Text Word] OR "superparamagnetic"[Text Word] OR "iron oxide"[Text Word] OR "magnetic technique"[Text Word] OR "Technetium"[MeSH Terms]))

The search string for Embase through OVID and Web of Science was translated by polyglot-translator, the search string for Cochrane consists of: (Colon OR colorectal) AND (cancer OR carcinoma) and the search string for PROSPERO of: (Colon OR colorectal) AND (cancer OR carcinoma) AND (lymphatic OR mapping OR sentinel).

Table S1: Quality assessment according to QUADAS-2 with partly review specific tailored questions

|                                                 | Risk of Bias                                                                                               |                                     |                                                                                                                                         |                                                                                                                                                                                                                                                                    | Applicability concerns                                                    |                                                                                          |                                                                                                                                        |
|-------------------------------------------------|------------------------------------------------------------------------------------------------------------|-------------------------------------|-----------------------------------------------------------------------------------------------------------------------------------------|--------------------------------------------------------------------------------------------------------------------------------------------------------------------------------------------------------------------------------------------------------------------|---------------------------------------------------------------------------|------------------------------------------------------------------------------------------|----------------------------------------------------------------------------------------------------------------------------------------|
|                                                 | a) Patient selection according to QUADAS-2                                                                 | b) Review specific index test       | c) Review specific applicability assessment                                                                                             | d) Flow and timing according to QUADAS-2                                                                                                                                                                                                                           | e) Review specific applicability of patient selection                     | f) Review specific index test                                                            | g) Review specific reference standard                                                                                                  |
|                                                 | <p>Was a consecutive sample of patients enrolled?</p> <p>Did the study avoid inappropriate exclusions?</p> | Was an oncologic surgery performed? | Was the number of metastatic LNs without additional staging given?                                                                      | <p>Was there an appropriate<sup>3</sup> interval between index test<sup>1</sup> and reference standard<sup>2</sup>?</p> <p>Did all patients receive a reference standard<sup>2</sup>?</p> <p>Did all patients receive the same reference standard<sup>2</sup>?</p> | Were rectum or rectosigmoid tumours included?                             | Was the tracer applicated peri-tumourous in vivo followed by pathological LN assessment? | Was LN data extractable without additional staging methods that could have introduced bias through more sensitive proof of metastasis? |
| ☺ = low risk of bias/low applicability concerns | Yes, to all questions                                                                                      | Yes                                 | Yes                                                                                                                                     | Yes, to all questions                                                                                                                                                                                                                                              | No                                                                        | Yes                                                                                      | yes                                                                                                                                    |
| ⊗ = high risk of bias/applicability concerns    | No, to either question                                                                                     | No                                  | Number of metastatic lymph nodes without additional staging methods retrieveable through text, supplementary data or contact of authors | No, to any question                                                                                                                                                                                                                                                | Yes, rectum and/or rectosigmoid tumours included, but CC data extractable | No                                                                                       | No                                                                                                                                     |
| ? = unclear risk of bias/applicability concerns | No mention of consecutive patient inclusion                                                                | Not mentioned                       | No mention of pathologic staging method – presumably standard assesment                                                                 | Not mentioned                                                                                                                                                                                                                                                      | Not specified                                                             | Not specified                                                                            | Not specified                                                                                                                          |

<sup>1</sup> Index Test: tracer application, <sup>2</sup>Reference Standard: tracer detection; <sup>3</sup>appropriate: between minutes to three days;

Table S2: Table of Analysis according to timing of tracer injection

| Timing of injection              | DURING SURGERY                         |                           | BEFORE SURGERY                         |                           |
|----------------------------------|----------------------------------------|---------------------------|----------------------------------------|---------------------------|
| Study                            | Rate in individual studies (95% CI)    | Weights meta-analysis (%) | Rate in individual studies (95% CI)    | Weights meta-analysis (%) |
| Albayrak (2010)                  | 16.8 (14.2, 19.8)                      | 3.2                       |                                        |                           |
| Andersen (2017)                  | 6.7 (4.8, 9.3)                         | 3.1                       |                                        |                           |
| Ankersmit (2019)                 | 14.7 (11.9, 18.1)                      | 3.1                       |                                        |                           |
| Bertagnolli (2004)               | 11.2 (9.5, 13.1)                       | 3.2                       |                                        |                           |
| Bertoglio (2004)                 | 19.9 (15.6, 25.0)                      | 3.0                       |                                        |                           |
| Bianchi (2007)                   | 9.8 (7.5, 12.6)                        | 3.1                       |                                        |                           |
| Caprioli (2022)                  | 32.4 (28.3, 36.9)                      | 3.1                       | 49.1 (40.1, 58.2)                      | 24.3                      |
| Covarelli (2007)                 | 7.1 (4.9, 10.3)                        | 3.1                       |                                        |                           |
| Currie (2017)                    | 8.8 (7.2, 10.8)                        | 3.2                       |                                        |                           |
| Dahl (2005)                      | 35.6 (31.6, 39.8)                      | 3.1                       |                                        |                           |
| De Haas (2012)                   |                                        |                           | 20.0 (14.8, 26.4)                      | 24.9                      |
| Esser (2001)                     | 11.0 (7.4, 15.9)                       | 2.9                       |                                        |                           |
| Faerden (2008)                   | 30.8 (29.0, 32.6)                      | 3.3                       |                                        |                           |
| Gurzu (2011)                     | 15.6 (11.8, 20.4)                      | 3.0                       |                                        |                           |
| Kelder (2007)                    | 15.7 (13.5, 18.1)                      | 3.2                       |                                        |                           |
| Lasser (2003)                    | 8.7 (6.8, 11.0)                        | 3.2                       |                                        |                           |
| Lim (2008)                       | 20.0 (18.4, 21.7)                      | 3.3                       |                                        |                           |
| Merrie (2001)                    | 15.1 (12.1, 18.7)                      | 3.1                       |                                        |                           |
| Murawa (2011)                    | 20.3 (18.3, 22.4)                      | 3.3                       |                                        |                           |
| Nagata (2006)                    | 24.4 (21.3, 27.7)                      | 3.2                       |                                        |                           |
| Nishigori (2015)                 |                                        |                           | 40.7 (33.7, 48)                        | 24.9                      |
| Oh (2014)                        | 9.0 (5.2, 15.0)                        | 2.7                       |                                        |                           |
| Paramo (2002)                    | 13.1 (10.8, 15.9)                      | 3.2                       |                                        |                           |
| Read (2005)                      | 14.3 (11.3, 18.0)                      | 3.1                       |                                        |                           |
| Retter (2011)                    | 6.0 (4.4, 8.2)                         | 3.2                       |                                        |                           |
| Saha (2006)                      | 14.7 (13.8, 15.6)                      | 3.3                       |                                        |                           |
| Serrano del Moral (2021)         | 12.5 (10.7, 14.5)                      | 3.2                       |                                        |                           |
| Soares (2019)                    | 3.3 (1.3, 8.1)                         | 2.7                       |                                        |                           |
| Staniloaie (2022)                | 5.6 (3.4, 9.1)                         | 3.0                       |                                        |                           |
| Terwisscha Van Scheltinga (2009) | 22.2 (18.9, 25.9)                      | 3.2                       |                                        |                           |
| Thomas (2006)                    | 14.0 (12.0, 16.2)                      | 3.2                       |                                        |                           |
| Tuech (2006)                     | 7.8 (6.0, 10.2)                        | 3.2                       |                                        |                           |
| Ushijima (2020)                  |                                        |                           | 15.6 (13.8, 17.6)                      | 25.9                      |
| Viehl (2013)                     | 12.5 (11.5, 13.6)                      | 3.3                       |                                        |                           |
| Zielinski (2011)                 | 12.5 (9.7, 16.0)                       | 3.1                       |                                        |                           |
| <b>Pooled rate (95% CI)</b>      | <b>14.1 (11.9, 16.5)</b>               | <b>100</b>                | <b>30.1 (15.4, 47.3)</b>               | <b>100</b>                |
| <b>Heterogeneity</b>             | <b>I<sup>2</sup>=96.9%, p&lt;0.001</b> |                           | <b>I<sup>2</sup>=97.0%, p&lt;0.001</b> |                           |

Table S3: Table of Analysis according to tracer used

| Tracer used                      | INK                                    |                           | RADIOCOLLOID                           |                           | ICG                                    |                           |
|----------------------------------|----------------------------------------|---------------------------|----------------------------------------|---------------------------|----------------------------------------|---------------------------|
| Study                            | Rate in individual studies (95% CI)    | Weights meta-analysis (%) | Rate in individual studies (95% CI)    | Weights meta-analysis (%) | Rate in individual studies (95% CI)    | Weights meta-analysis (%) |
| Albayrak (2010)                  | 16.8 (14.2, 19.8)                      | 4.6                       |                                        |                           |                                        |                           |
| Andersen (2017)                  |                                        |                           |                                        |                           | 6.7 (4.8, 9.3)                         | 12.6                      |
| Ankersmit (2019)                 |                                        |                           |                                        |                           | 14.7 (11.9, 18.1)                      | 12.6                      |
| Bertagnolli (2004)               | 11.2 (9.5, 13.1)                       | 4.7                       |                                        |                           |                                        |                           |
| Bertoglio (2004)                 | 19.9 (15.6, 25.0)                      | 4.3                       |                                        |                           |                                        |                           |
| Bianchi (2007)                   | 9.8 (7.5, 12.6)                        | 4.6                       |                                        |                           |                                        |                           |
| Caprioli (2022)                  |                                        |                           |                                        |                           | 35.8 (32.0, 39.9)                      | 12.7                      |
| Covarelli (2007)                 |                                        |                           | 7.1 (4.9, 10.3)                        | 16.6                      |                                        |                           |
| Currie (2017)                    |                                        |                           |                                        |                           | 8.8 (7.2, 10.8)                        | 12.8                      |
| Dahl (2005)                      | 35.6 (31.6, 39.8)                      | 4.6                       |                                        |                           |                                        |                           |
| De Haas (2012)                   |                                        |                           | 20.0 (14.8, 26.4)                      | 14.8                      |                                        |                           |
| Esser (2001)                     | 11.0 (7.4, 15.9)                       | 4.2                       |                                        |                           |                                        |                           |
| Faerden (2008)                   | 30.8 (29.0, 32.6)                      | 4.8                       |                                        |                           |                                        |                           |
| Gurzu (2011)                     | 15.6 (11.8, 20.4)                      | 4.3                       |                                        |                           |                                        |                           |
| Kelder (2007)                    | 15.7 (13.5, 18.1)                      | 4.7                       |                                        |                           |                                        |                           |
| Lasser (2003)                    | 8.7 (6.8, 11.0)                        | 4.6                       |                                        |                           |                                        |                           |
| Merrie (2001)                    |                                        |                           | 15.1 (12.1, 18.7)                      | 17.1                      |                                        |                           |
| Murawa (2011)                    | 20.3 (18.3, 22.4)                      | 4.7                       |                                        |                           |                                        |                           |
| Nagata (2006)                    |                                        |                           |                                        |                           | 24.4 (21.3, 27.7)                      | 12.7                      |
| Nishigori (2015)                 |                                        |                           |                                        |                           | 40.7 (33.7, 48.0)                      | 12.1                      |
| Oh (2014)                        | 9.0 (5.2, 15.0)                        | 3.9                       |                                        |                           |                                        |                           |
| Paramo (2002)                    | 13.1 (10.8, 15.9)                      | 4.6                       |                                        |                           |                                        |                           |
| Read (2005)                      | 14.3 (11.3, 18.0)                      | 4.5                       |                                        |                           |                                        |                           |
| Retter (2011)                    | 6.0 (4.4, 8.2)                         | 4.6                       |                                        |                           |                                        |                           |
| Saha (2006)                      | 14.7 (13.8, 15.6)                      | 4.8                       |                                        |                           |                                        |                           |
| Sandrucci (2007)                 |                                        |                           | 25.9 (20.9, 31.6)                      | 15.9                      |                                        |                           |
| Serrano del Moral (2021)         |                                        |                           | 12.5 (10.7, 14.5)                      | 18.2                      |                                        |                           |
| Soares (2019)                    |                                        |                           |                                        |                           | 3.3 (1.3, 8.1)                         | 11.7                      |
| Staniloaie (2022)                | 5.6 (3.4, 9.1)                         | 4.3                       |                                        |                           |                                        |                           |
| Terwisscha Van Scheltinga (2009) | 18.9 (15.8, 22.4)                      | 4.6                       | 14.7 (12.0, 17.9)                      | 17.4                      |                                        |                           |
| Thomas (2006)                    | 14.0 (12.0, 16.2)                      | 4.7                       |                                        |                           |                                        |                           |
| Tuech (2006)                     | 7.8 (6.0, 10.2)                        | 4.6                       |                                        |                           |                                        |                           |
| Ushijima (2020)                  |                                        |                           |                                        |                           | 15.6 (13.8, 17.6)                      | 12.8                      |
| Viehl (2013)                     | 12.5 (11.5, 13.6)                      | 4.8                       |                                        |                           |                                        |                           |
| Zielinski (2011)                 | 12.5 (9.7, 16.0)                       | 4.5                       |                                        |                           |                                        |                           |
| <b>Pooled rate (95% CI)</b>      | <b>14.2 (11.6, 17.0)</b>               | <b>100</b>                | <b>15.2 (11.1, 19.7)</b>               | <b>100</b>                | <b>17.1 (10.3, 25.0)</b>               | <b>100</b>                |
| <b>Heterogeneity</b>             | <b>I<sup>2</sup>=97.0%, p&lt;0.001</b> |                           | <b>I<sup>2</sup>=89.8%, p&lt;0.001</b> |                           | <b>I<sup>2</sup>=97.8%, p&lt;0.001</b> |                           |

Table S4: Table of Analysis according to location of tracer injection

| Location of injection            | SUBMUCOSAL                             |                           | SUBSerosal                             |                           |
|----------------------------------|----------------------------------------|---------------------------|----------------------------------------|---------------------------|
| Study                            | Rate in individual studies (95% CI)    | Weights meta-analysis (%) | Rate in individual studies (95% CI)    | Weights meta-analysis (%) |
| Albayrak (2010)                  |                                        |                           | 16.8 (14.2, 19.8)                      | 3.3                       |
| Andersen (2017)                  |                                        |                           | 6.7 (4.8, 9.3)                         | 3.2                       |
| Ankersmit (2019)                 | 14.3 (10.5, 19.1)                      | 16.7                      | 15.2 (11.2, 20.2)                      | 3.1                       |
| Bertagnolli (2004)               |                                        |                           | 11.2 (9.5, 13.1)                       | 3.4                       |
| Bertoglio (2004)                 |                                        |                           | 19.9 (15.6, 25.0)                      | 3.1                       |
| Bianchi (2007)                   |                                        |                           | 9.8 (7.5, 12.6)                        | 3.3                       |
| Caprioli (2022)                  | 49.1 (40.1, 58.2)                      | 15.8                      | 32.4 (28.3, 36.9)                      | 3.2                       |
| Covarelli (2007)                 |                                        |                           | 7.1 (4.9, 10.3)                        | 3.2                       |
| Currie (2017)                    | 8.8 (7.2, 10.8)                        | 17.3                      |                                        |                           |
| Dahl (2005)                      |                                        |                           | 35.6 (31.6, 39.8)                      | 3.3                       |
| De Haas (2012)                   | 20.0 (14.8, 26.4)                      | 16.4                      |                                        |                           |
| Esser (2001)                     |                                        |                           | 11.0 (7.4, 15.9)                       | 3.0                       |
| Faerden (2008)                   |                                        |                           | 30.8 (29.0, 32.6)                      | 3.4                       |
| Gurzu (2011)                     |                                        |                           | 15.6 (11.8, 20.4)                      | 3.1                       |
| Kelder (2007)                    |                                        |                           | 15.7 (13.5, 18.1)                      | 3.3                       |
| Lasser (2003)                    |                                        |                           | 8.7 (6.8, 11.0)                        | 3.3                       |
| Lim (2008)                       |                                        |                           | 20.0 (18.4, 21.7)                      | 3.4                       |
| Merrie (2001)                    |                                        |                           | 15.1 (12.1, 18.7)                      | 3.2                       |
| Murawa (2011)                    |                                        |                           | 20.3 (18.3, 22.4)                      | 3.4                       |
| Nagata (2006)                    |                                        |                           | 24.4 (21.3, 27.7)                      | 3.3                       |
| Nishigori (2015)                 | 40.7 (33.7, 48)                        | 16.4                      |                                        |                           |
| Oh (2014)                        |                                        |                           | 9.0 (5.2, 15.0)                        | 2.8                       |
| Paramo (2002)                    |                                        |                           | 13.1 (10.8, 15.9)                      | 3.3                       |
| Read (2005)                      |                                        |                           | 14.3 (11.3, 18.0)                      | 3.2                       |
| Retter (2011)                    |                                        |                           | 6.0 (4.4, 8.2)                         | 3.3                       |
| Saha (2006)                      |                                        |                           | 14.7 (13.8, 15.6)                      | 3.4                       |
| Serrano del Moral (2021)         |                                        |                           | 12.5 (10.7, 14.5)                      | 3.4                       |
| Soares (2019)                    |                                        |                           | 3.3 (1.3, 8.1)                         | 2.8                       |
| Staniloaie (2022)                |                                        |                           | 5.6 (3.4, 9.1)                         | 3.1                       |
| Terwisscha Van Scheltinga (2009) |                                        |                           | 22.2 (18.9, 25.9)                      | 3.3                       |
| Thomas (2006)                    |                                        |                           | 14.0 (12.0, 16.2)                      | 3.3                       |
| Tuech (2006)                     |                                        |                           | 7.8 (6.0, 10.2)                        | 3.3                       |
| Ushijima (2020)                  | 15.6 (13.8, 17.6)                      | 17.4                      |                                        |                           |
| Viehl (2013)                     |                                        |                           | 12.5 (11.5, 13.6)                      | 3.4                       |
| Zielinski (2011)                 |                                        |                           | 12.5 (9.7, 16.0)                       | 3.2                       |
| <b>Pooled rate (95% CI)</b>      | <b>22.9 (14.1, 33.1)</b>               | <b>100</b>                | <b>14.3 (12.1, 16.8)</b>               | <b>100</b>                |
| <b>Heterogeneity</b>             | <b>I<sup>2</sup>=96.9%, p&lt;0.001</b> |                           | <b>I<sup>2</sup>=96.9%, p&lt;0.001</b> |                           |

## Sources:

1. Nagata, K., et al., *Laparoscopic sentinel node mapping for colorectal cancer using infrared ray laparoscopy*. Anticancer Res, 2006. **26**(3b): p. 2307-11.
2. Saha, S., et al., *A multicenter trial of sentinel lymph node mapping in colorectal cancer: prognostic implications for nodal staging and recurrence*. Am J Surg, 2006. **191**(3): p. 305-10.
3. Nishigori, N., et al., *Visualization of Lymph/Blood Flow in Laparoscopic Colorectal Cancer Surgery by ICG Fluorescence Imaging (Lap-IGFI)*. Ann Surg Oncol, 2016. **23 Suppl 2**: p. S266-74.
4. Clark, J.M., et al., *Improving the translation of search strategies using the Polyglot Search Translator: a randomized controlled trial*. J Med Libr Assoc, 2020. **108**(2): p. 195-207.
5. Ho, M.F., et al., *Personalized laparoscopic resection of colon cancer with the use of indocyanine green lymph node mapping: Technical and clinical outcomes*. Asian journal of endoscopic surgery, 2022. **15**(3): p. 563-568.
6. Caprioli, M., et al., *Fluorescence-guided nodal navigation during colectomy for colorectal cancer*. Minim Invasive Ther Allied Technol, 2022. **31**(6): p. 879-886.
7. Staniloaie, D., et al., *Role of methylene blue in detecting the sentinel lymph node in colorectal cancer: In vivo vs. ex vivo technique*. Experimental and Therapeutic Medicine, 2022. **23**(1).
8. Kinoshita, H., et al., *Timing of real-time indocyanine green fluorescence visualization for lymph node dissection during laparoscopic colon cancer surgery*. Langenbecks Arch Surg, 2023. **408**(1): p. 38.
9. Ribero, D., et al., *ICG-Guided Lymphadenectomy during Surgery for Colon and Rectal Cancer-Interim Analysis of the GREENLIGHT Trial*. Biomedicines, 2022. **10**(3).
10. Ankersmit, M., et al., *Near-infrared fluorescence imaging for sentinel lymph node identification in colon cancer: a prospective single-center study and systematic review with meta-analysis*. Tech Coloproctol, 2019. **23**(12): p. 1113-1126.
11. Burghgraef, T.A., et al., *In vivo sentinel lymph node identification using fluorescent tracer imaging in colon cancer: A systematic review and meta-analysis*. Crit Rev Oncol Hematol, 2021. **158**: p. 103149.
12. Codignola, C., et al., *Is there any role for sentinel node mapping in colorectal cancer staging? Personal experience and review of the literature*. Jpn J Clin Oncol, 2005. **35**(11): p. 645-50.
13. Emile, S.H., et al., *Sensitivity and specificity of indocyanine green near-infrared fluorescence imaging in detection of metastatic lymph nodes in colorectal cancer: Systematic review and meta-analysis*. J Surg Oncol, 2017. **116**(6): p. 730-740.
14. Qiao, L., *Sentinel lymph node mapping for metastasis detection in colorectal cancer: A systematic review and meta-analysis*. Revista Espanola de Enfermedades Digestivas, 2020. **112**(9): p. 722-730.
15. Son, G.M., et al., *Multifunctional Indocyanine Green Applications for Fluorescence-Guided Laparoscopic Colorectal Surgery*. Annals of Coloproctology, 2021. **37**(3): p. 133-140.
16. van der Zaag, E.S., et al., *Systematic Review of Sentinel Lymph Node Mapping Procedure in Colorectal Cancer*. Annals of Surgical Oncology, 2012. **19**(11): p. 3449-3459.
17. Dahl, K., et al., *Identification of sentinel nodes in patients with colon cancer*. Eur J Surg Oncol, 2005. **31**(4): p. 381-5.
